# Supplementary material for: Mechanistic basis for maintenance of CHG DNA methylation in plants
Source: PubMed Central journal article supplement (PMC9256654; doi:10.1038/s41467-022-31627-3), 2022-07-05
Supplement: 41467_2022_31627_MOESM1_ESM.pdf [file 41467_2022_31627_MOESM1_ESM.pdf]

## Supplementary Information

### **Mechanistic basis for maintenance of CHG DNA methylation in plants**

Jian Fang<sup>1,4</sup>, Jianjun Jiang<sup>2,3,4</sup>, Sarah M. Leichter<sup>2,3,4</sup>, Jie Liu<sup>3</sup>, Mahamaya Biswal<sup>1</sup>, Nelli Khudaverdyan<sup>1</sup>, Xuehua Zhong<sup>2,3,\*</sup>, Jikui Song<sup>1,\*</sup>

<sup>1</sup>Department of Biochemistry, University of California, Riverside, CA 92521, USA

<sup>2</sup>Laboratory of Genetics, University of Wisconsin-Madison, Madison, WI 53706, USA

<sup>3</sup>Wisconsin Institute for Discovery, University of Wisconsin-Madison, Madison, WI 53715, USA.

<sup>4</sup>These authors contributed equally to this work

\*Correspondence: [xuehua.zhong@wisc.edu](mailto:xuehua.zhong@wisc.edu) or [jikui.song@ucr.edu](mailto:jikui.song@ucr.edu)



**Supplementary Fig. 1 | Sequence analysis of CMT3 proteins from various species.**

(a) Domain architecture of ZMET2 and *Arabidopsis* CMT3, with individual domains color-coded and delimited by residue numbers. (b) Sequence alignment of ZMET2 with CMT3 proteins from various plant species. Strictly conserved residues are colored white in red background. Partially conserved residues are colored red. The DNA-, H3K9me2 peptide-, and SAH-binding sites are indicated by red, black and blue asterisks, respectively, on top. Individual domains and enzymatic motifs are also labeled on top.

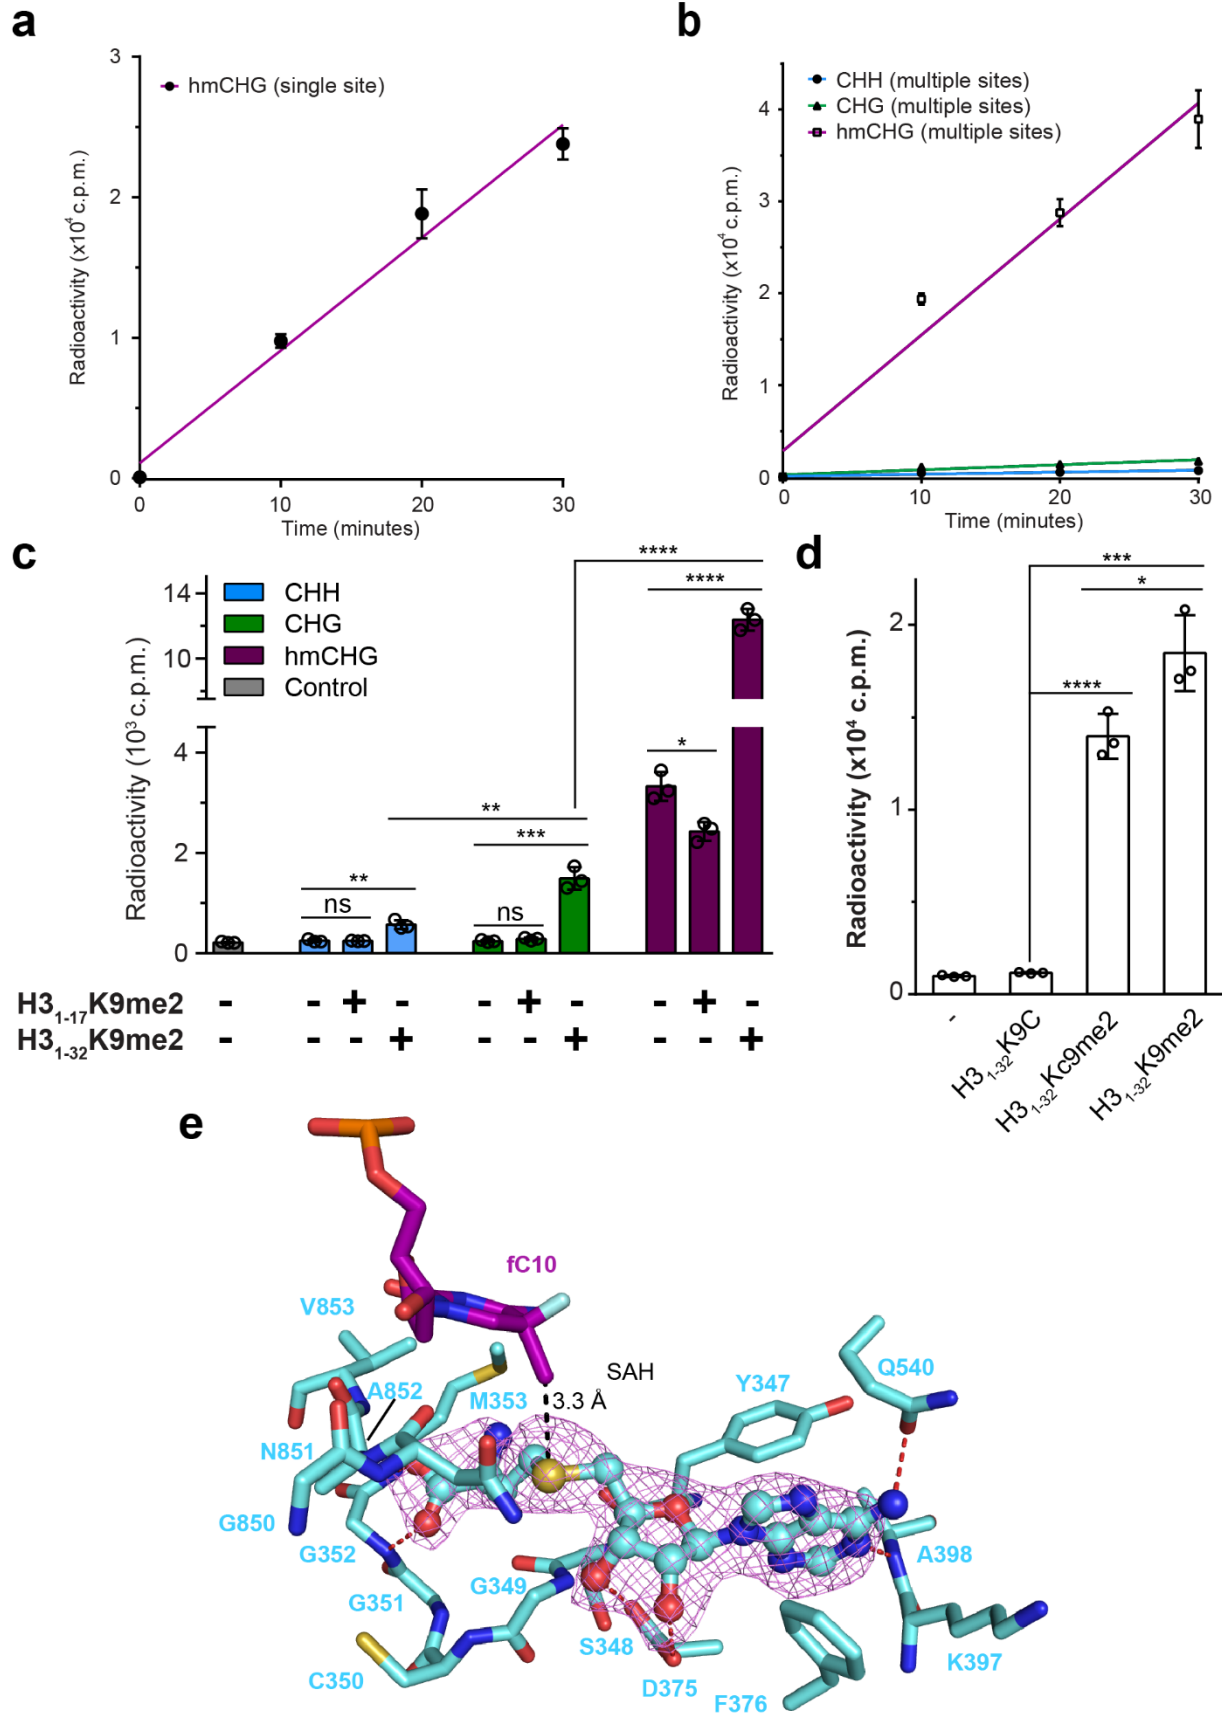

## Supplementary Fig. 2 | Enzymatic and structural analysis of CMTs.

(a,b) *In vitro* enzymatic assays of ZMET2 on DNA containing single hmCHG site (a) or multiple CHH, CHG or hmCHG sites (b). (c) *In vitro* DNA methylation assay of CMT3 on DNA duplex containing multiple CHH, CHG, or hmCHG sites, in the presence or absence of H3K9me2 peptides. Control, no substrate present. Data are mean  $\pm$  s.d. (n = 3 biological replicates). Statistical analysis used two-tailed Student's t-test. No adjustments were made for multiple comparisons. ns, not significant; \*,  $p < 0.05$ ; \*\*,  $p < 0.01$ ; \*\*\*,  $p < 0.001$ ; \*\*\*\*,  $p < 0.0001$ . (d) *In vitro* DNA methylation assays of ZMET2 on DNA containing single hmCHG target site in the presence or absence of K9C-mutated H3<sub>1-32</sub>, H3<sub>1-32</sub>Kc9me2 or H3<sub>1-32</sub>K9me2 peptide. Data are mean  $\pm$  s.d. (n = 3 biological replicates). Statistical analysis used two-tailed Student's t-test. No adjustments were made for multiple comparisons. ns, not significant; \*,  $p < 0.05$ ; \*\*\*,  $p < 0.001$ ; \*\*\*\*,  $p < 0.0001$ . (e) Close-up view of the SAH-binding site of ZMET2, with the Fo-Fc omit map (violet) for the SAH molecule contoured at  $2.0\sigma$  level. The distance between the 5-methyl group of fC10 and sulfur atom of the SAH molecule is marked. Source data are provided as a Source Data file.

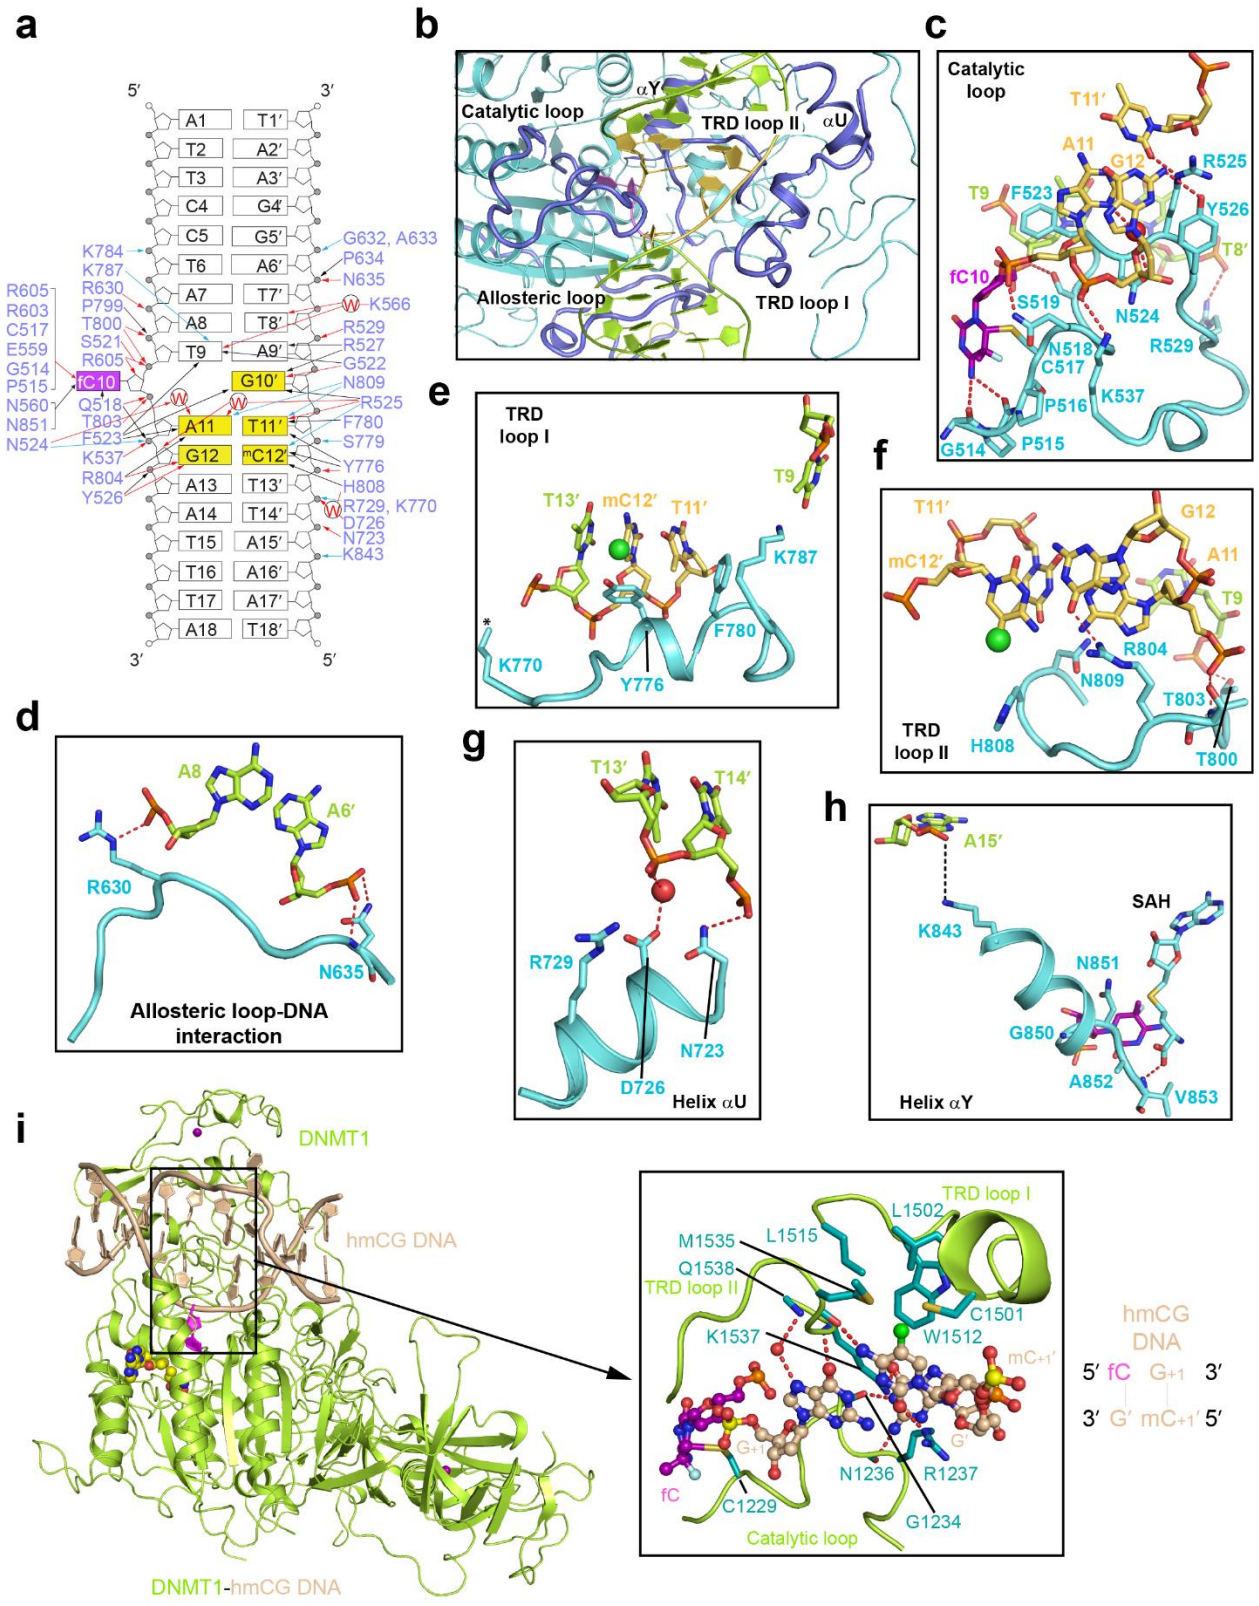

### Supplementary Fig. 3 | Structural details for the ZMET2-hmCAG interaction.

(a) Schematic view of the ZMET2-hmCAG interactions. Hydrogen-bonding, electrostatic, and van der Waals contacts are indicated by red, cyan, and black arrows, respectively. Water-mediated hydrogen bonds are labeled by letter 'W'. (b) Structural overview of the structural elements of ZMET2 responsible for DNA binding, colored in slate. (c-h) Close-up view of the DNA interaction by the catalytic loop (c), allosteric loop (d), TRD loop I (e), TRD loop II (f), Helix  $\alpha$ U (g) and Helix  $\alpha$ Y (h). The hydrogen-bonding and van der Waals contacts are depicted as red and black dashed lines, respectively. The water molecule is shown as red sphere. (i) Ribbon diagram of mouse DNMT1 (limon) in complex with hemimethylated CG DNA (wheat) (PDB 4DA4), with the interactions for base-specific recognition of the fCG/mCG motif shown in expanded view. The hydrogen bonds are shown as dashed lines. The DNA-interacting residues of DNMT1 is labeled. The 5-methyl group of 5mC on the target strand is shown as a green sphere.

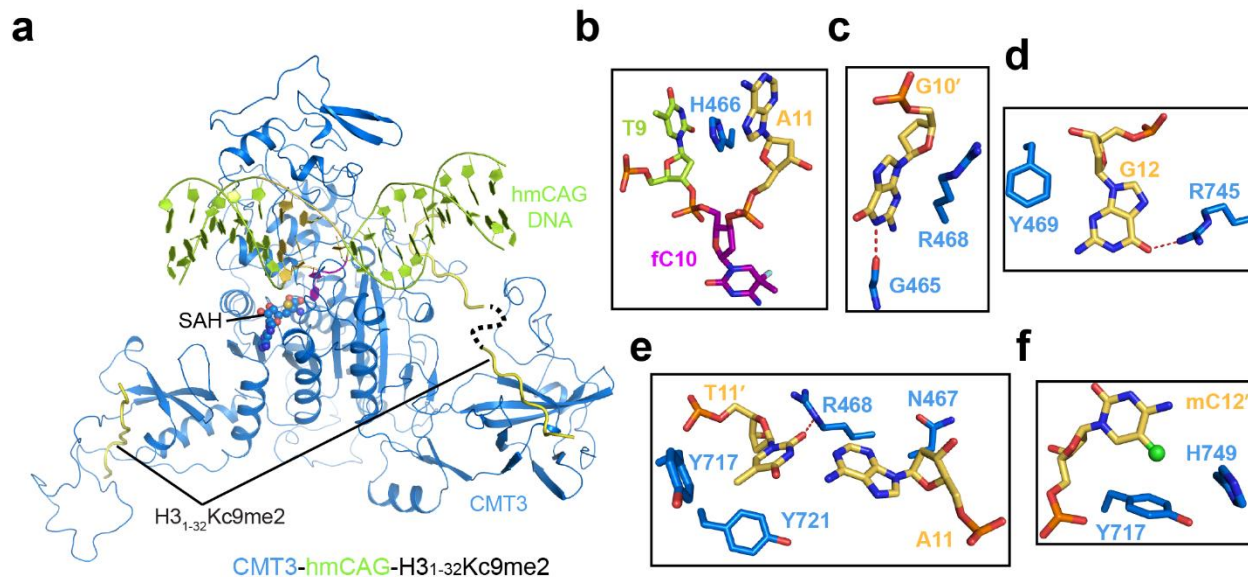

**Supplementary Fig. 4 | Structural model of the CMT3-hmCAG-H3Kc9me2 complex.**

(a) Structural overview of the CMT3-hmCAG-H3<sub>1-32</sub>Kc9me2 complex. The disordered residues T11-G13 of the H3<sub>1-32</sub>Kc9me2 peptide is shown as a dashed line. (b-f) Close-up view of the CMT3-DNA interactions at the DNA cavity after fC10 flipping (b), orphan G10' site (c), CHG guanine G12 (d), +1-flanking A11-T11' pair (e), and mC12' (f). The hydrogen bonds are shown as dashed lines.



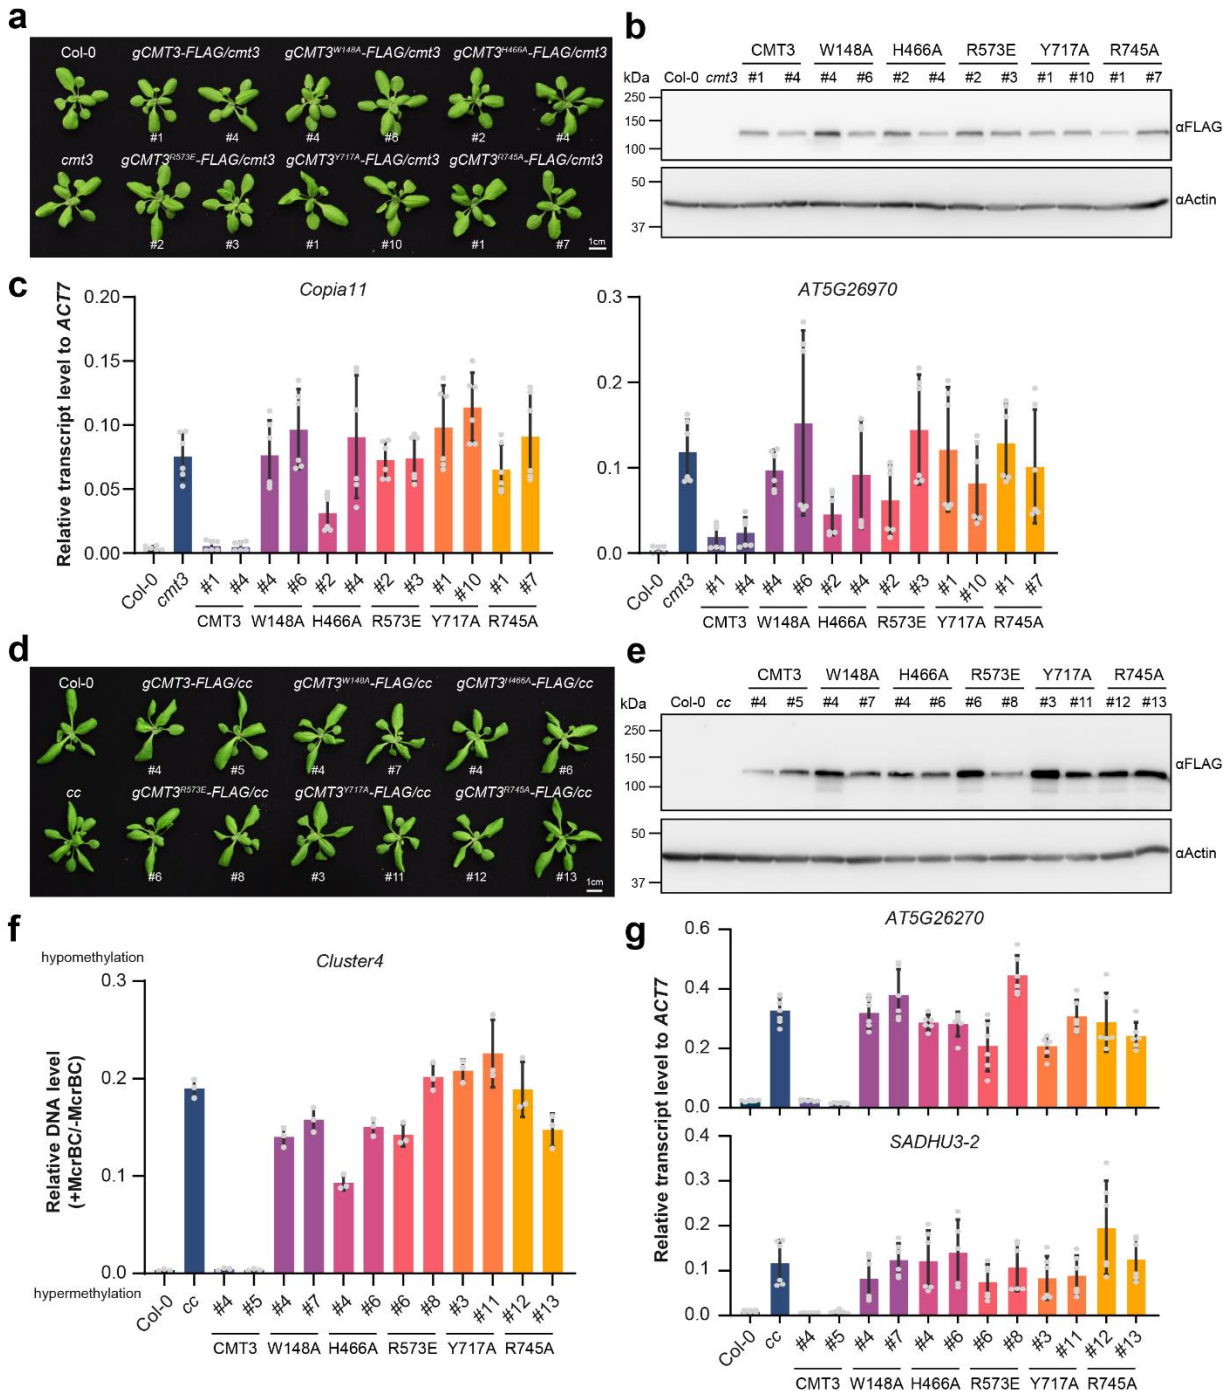

### Supplementary Fig. 5 | Effect of CMT3 mutations on genomic DNA methylation.

(a) Phenotypes of 3-week-old Arabidopsis expressing wild-type and mutant CMT3-FLAG in *cmt3* mutant background. Col-0 and *cmt3* served as controls. (b) Immunoblots showing the CMT3 protein level of the same lines in panel (a). Actin served as a loading control. (c) The relative transcript level of TE *Copia11* and gene *AT5G26970* was measured with reverse-transcription quantitative PCR in the transgenic lines. The RNA

transcript was normalized to *ACT7*. Data are mean  $\pm$  s.d. (n=6 technical replicates from n=2 independent experiments). (d) Phenotypes of 3-week-old Arabidopsis expressing wild-type and mutant CMT3-FLAG in *cmt2 cmt3* (*cc*) mutant background. (e) Immunoblots showing the CMT3 protein level of the same lines in panel (d). Actin served as a loading control. (f) DNA methylation of *Cluster4* locus in Arabidopsis transgenic lines in *cc* background measured by McrBC-qPCR assay. Data are mean  $\pm$  SD from three technical replicates. (g) The relative transcript level of TE *SADHU3-2* and gene *AT5G26270* in the transgenic lines in *cc* background. Data are mean  $\pm$  s.d. (n=6 technical replicates from n=2 independent experiments). Source data are provided as a Source Data file.

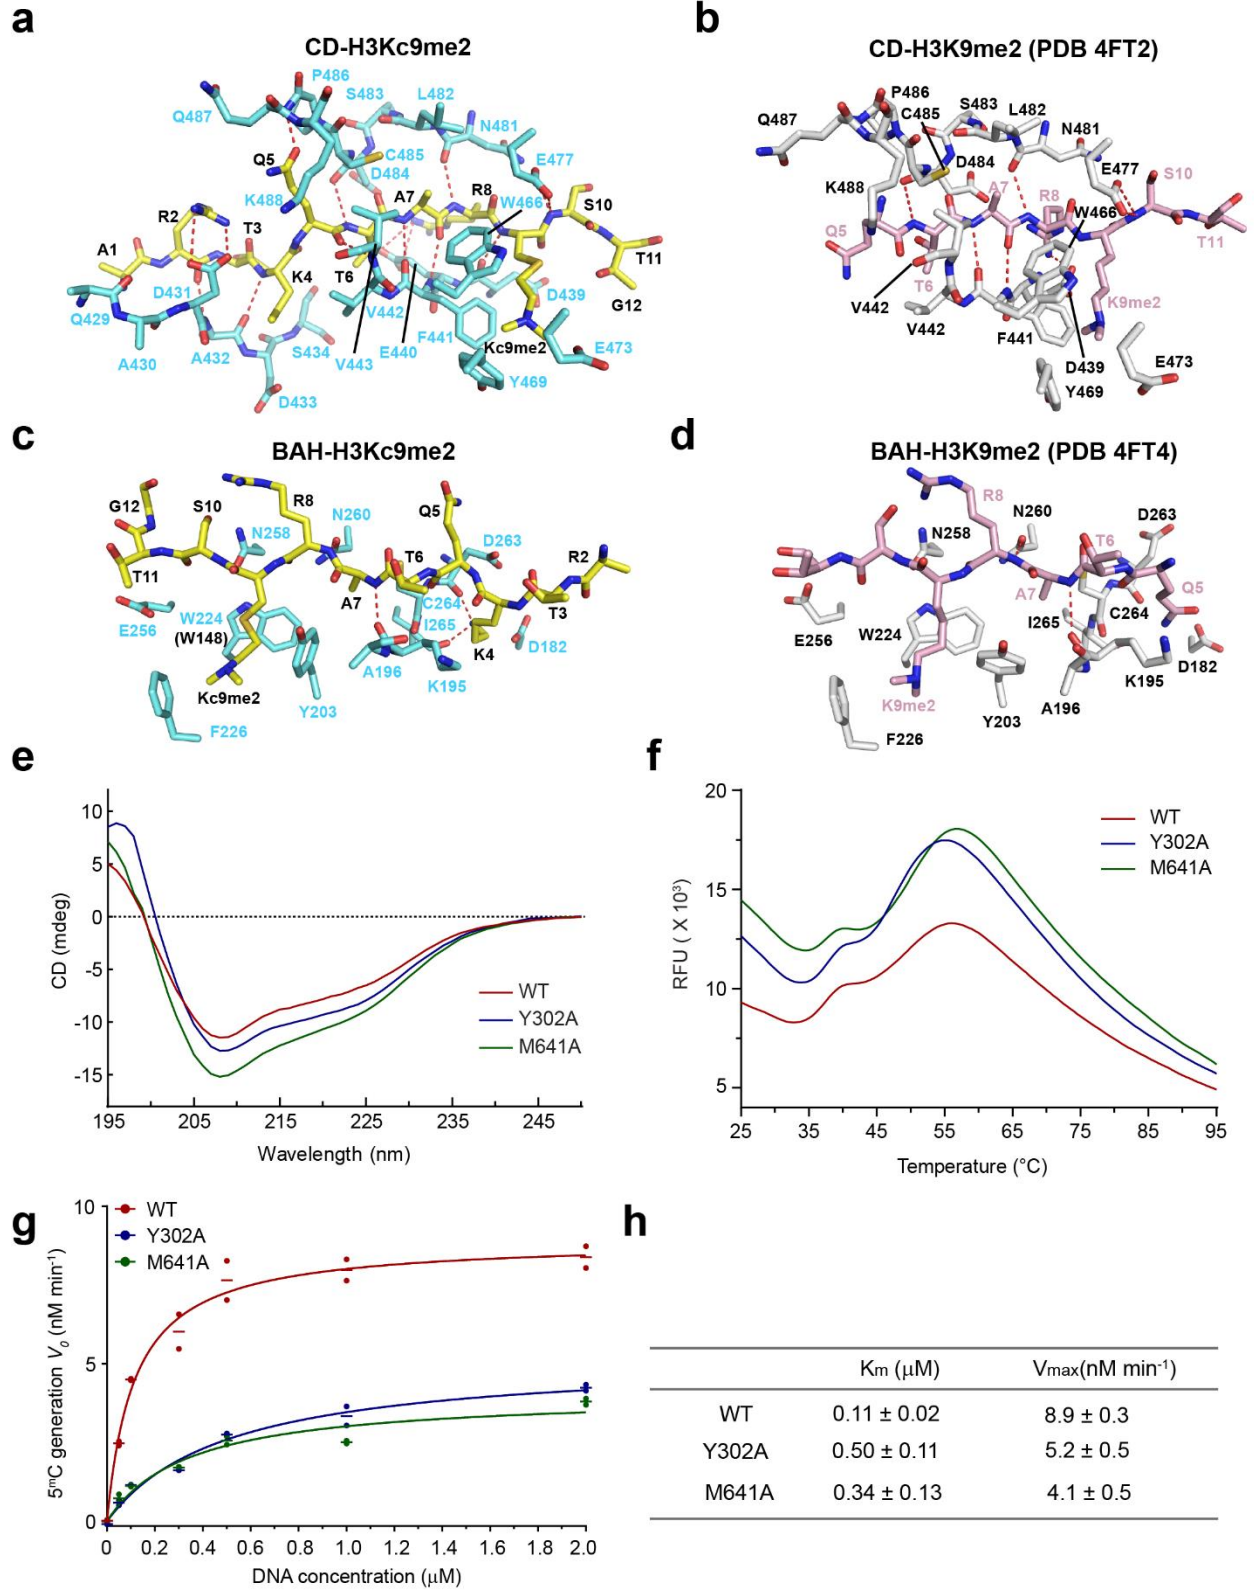

**Supplementary Fig. 6 | Structural and biochemical analysis of the H3 peptide readout by CMTs**

**(a, b)** Close-up view of the interaction between ZMET2 CD and H3<sub>1-32</sub>K9me<sub>2</sub> peptide in the ZMET2-hmCAG-H3<sub>1-32</sub>Kc9me<sub>2</sub> (a) or ZMET2-H3<sub>1-15</sub>K9me<sub>2</sub> (4FT2) (b) complex. The hydrogen bonds are shown as dashed lines. Note that residues Q429-S434 of ZMET2 are disordered in the ZMET2-H3<sub>1-15</sub>K9me<sub>2</sub> complex (PDB 4FT2), presumably due to the crystal packing effect. **(c,d)** Close-up view of the interaction between ZMET2 BAH and the N-terminal half (residues 1-12) of the H3<sub>1-32</sub>Kc9me<sub>2</sub> peptide in the ZMET2-hmCAG-H3<sub>1-32</sub>Kc9me<sub>2</sub> (c) or ZMET2-H3<sub>1-32</sub>K9me<sub>2</sub> (4FT4) (d) complex. **(e)** Overlaid CD spectra of wild type (WT), Y302A, and M641A ZMET2 protein. **(f)** Thermal shift assay for the WT, Y302A, and M641A ZMET2 protein, with the raw fluorescence data shown. **(g)** DNA methylation rate of WT, Y302A, and M641A ZMET2 protein as a function of substrate concentration. Data points and the corresponding mean (bar) are derived from n=2 independent measurements. **(h)** The steady-state Michaelis–Menten parameters of WT, Y302A and M641A ZMET2 derived from (g). The mean and error estimate were derived from curve fitting. Source data are provided as a Source Data file.

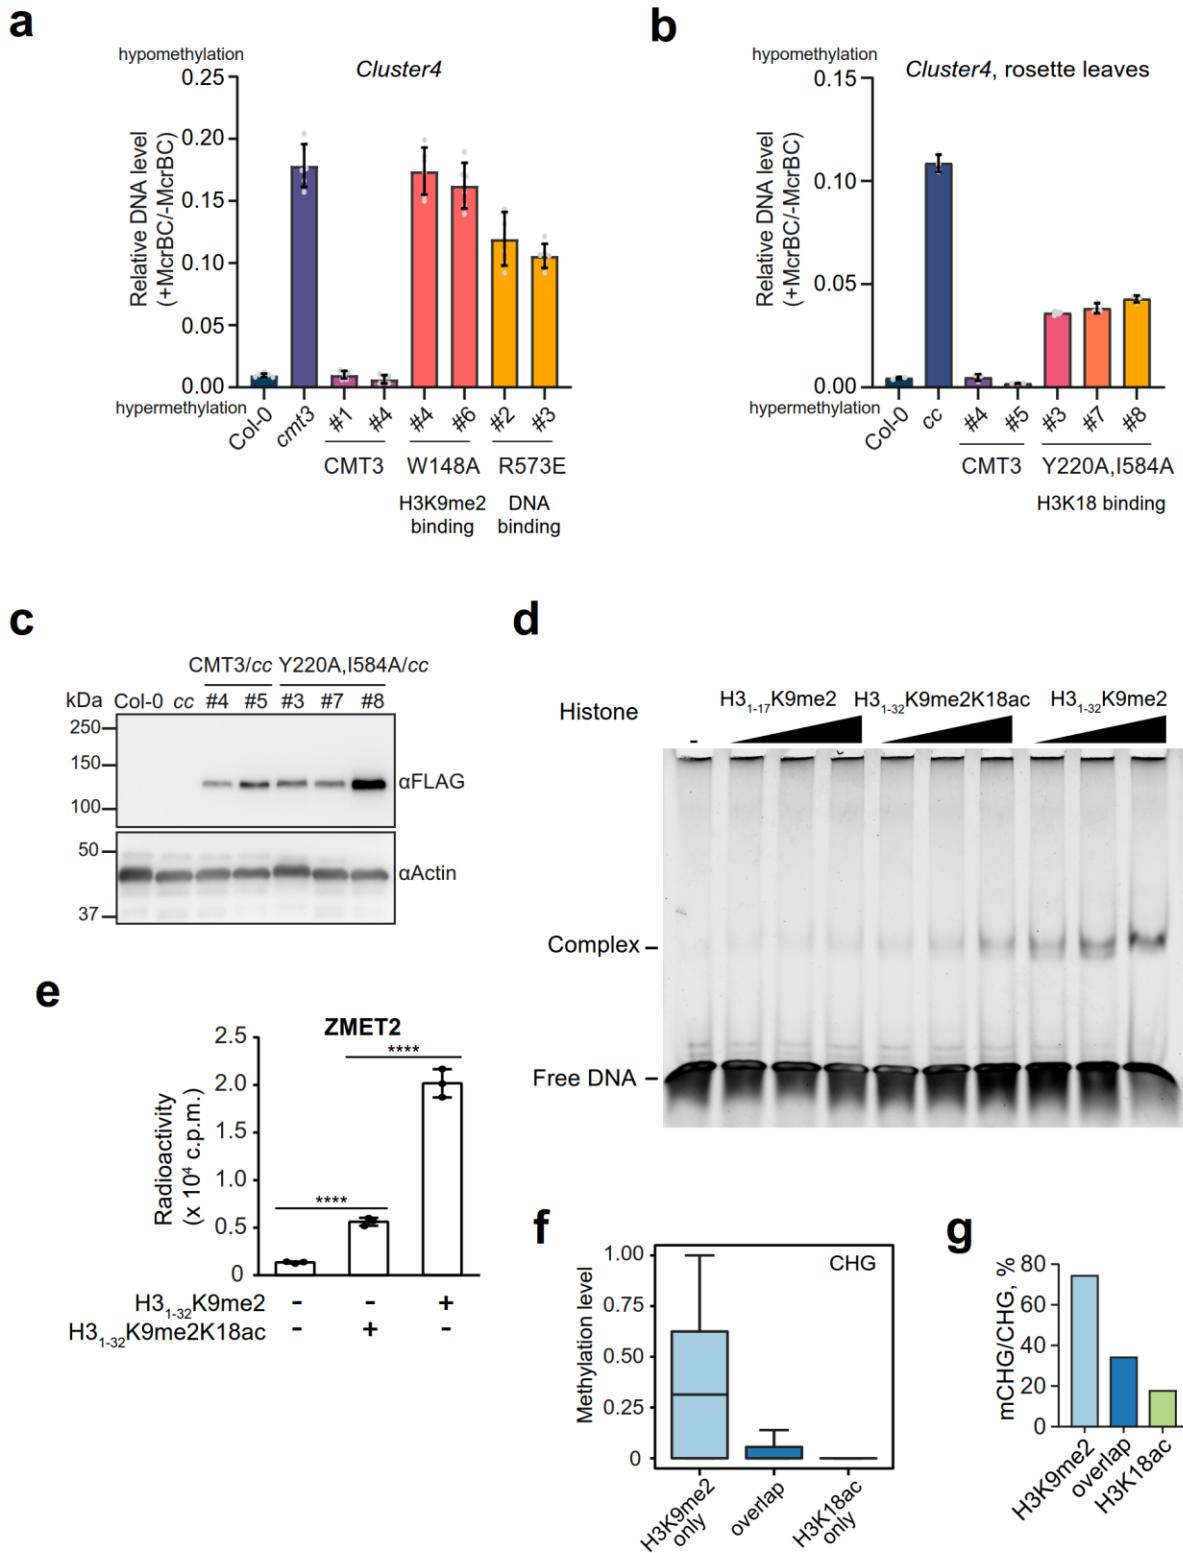

**Supplementary Fig. 7 | Functional analysis of the allosteric activation of CMT3/ZMET2 by the H3K9me2/H3K18 readout**

(a) DNA methylation of *Cluster4* locus in *Arabidopsis* transgenic lines in *cmt3* background measured by McrBC-qPCR assay. 10-d-old seedlings were used. Data are mean  $\pm$  s.d. (n=6 technical replicates from n=2 independent experiments). (b) DNA methylation of *Cluster4* locus in *Arabidopsis* transgenic lines in *cc* background measured by McrBC-qPCR assay. The rosette leaves from 3-week-old plants were used. The Y220A,I584A/*cc* transgenic lines were in T<sub>1</sub> generation. Data are mean  $\pm$  s.d. (n=3 technical replicates). (c) Immunoblots showing the wild type and Y220A/I584A mutant CMT3 protein level in *cc* background. Actin served as a loading control. (d) EMSA analysis of the DNA-binding activity of ZMET2, in presence of different H3 peptides. The experiment was repeated twice with consistent results. (e) *In vitro* DNA methylation assays of ZMET2 on DNA containing single hmCHG site. Data are mean  $\pm$  s.d. (n = 3 biological replicates). Statistical analysis used two-tailed Student's t-test. \*\*\*\*,  $p < 0.0001$ . (f, g) CHG methylation level (f) and the ratio of methylated CHG over all CHG sites (mCHG/CHG) (g) of Col-0 in the peaks in Fig. 3j. The numbers of ChIP peaks are 1852 (H3K9me2 only), 206 (overlap), and 12036 (H3K18ac only). The lower and upper box edges correspond to the first and third quartiles, the horizontal lines indicate the median, and the lower and upper whiskers denote the smallest and largest values at most  $1.5 \times$  IQR, respectively. Source data are provided as a Source Data file.

**Supplementary Table 1. Data collection and refinement statistics.**

---

|                                                     | ZMET2-hmCAG-H3Kc9me2<br>(PDB: 7UBU)            |
|-----------------------------------------------------|------------------------------------------------|
| <b>Data collection</b>                              |                                                |
| Space group                                         | P 2 <sub>1</sub> 2 <sub>1</sub> 2 <sub>1</sub> |
| Cell dimensions                                     |                                                |
| <i>a</i> , <i>b</i> , <i>c</i> (Å)                  | 64.6, 121.4, 160.4                             |
| <i>a</i> , <i>b</i> , <i>g</i> (°)                  | 90.00, 90.00, 90.00                            |
| Resolution (Å)                                      | 160.45-2.39(2.47-2.39) <sup>a</sup>            |
| <i>R</i> <sub>merge</sub>                           | 0.129(1.873)                                   |
| <i>I</i> / <i>s</i> ( <i>I</i> )                    | 10.1(0.8)                                      |
| <i>CC</i> <sub>1/2</sub>                            | 0.992(0.380)                                   |
| Completeness (%)                                    | 99.53(99.9)                                    |
| Redundancy                                          | 5.7(6.0)                                       |
| <b>Refinement</b>                                   |                                                |
| No. reflections                                     | 50,221                                         |
| <i>R</i> <sub>work</sub> / <i>R</i> <sub>free</sub> | 0.211/0.256                                    |
| No. atoms                                           |                                                |
| Protein                                             | 5571                                           |
| Peptide                                             | 240                                            |
| DNA                                                 | 733                                            |
| SAH                                                 | 26                                             |
| Water                                               | 120                                            |
| <i>B</i> factors (Å <sup>2</sup> )                  |                                                |
| Protein                                             | 74.0                                           |
| Peptide                                             | 101.1                                          |
| DNA                                                 | 100.0                                          |
| SAH                                                 | 64.9                                           |
| Water                                               | 68.0                                           |
| r.m.s deviations                                    |                                                |
| Bond lengths (Å)                                    | 0.006                                          |
| Bond angles (°)                                     | 0.855                                          |

---

<sup>a</sup>Values in parentheses are for highest-resolution shell, which was determined based on *CC*<sub>1/2</sub> > 0.3. Each structure was determined using the dataset collected from a single crystal.

## Supplementary Table 2. Sequencing Statistics

| Sample                 | Total reads | Aligned reads | % aligned | unique reads | % unique | *Fold Coverage | Bisulfite conversion |
|------------------------|-------------|---------------|-----------|--------------|----------|----------------|----------------------|
| Col-0                  | 59444216    | 56484853      | 95        | 44932612     | 75.6     | 18.9           | 99.6                 |
| <i>cmt3</i>            | 58331559    | 55602517      | 95.3      | 44187132     | 75.8     | 18.6           | 99.6                 |
| R745A/ <i>cmt3</i>     | 63566301    | 62199752      | 97.9      | 49485354     | 77.8     | 20.8           | 99.6                 |
| CMT3/ <i>cmt3</i>      | 52995070    | 51707665      | 97.6      | 41898929     | 79.1     | 17.60          | 99.5                 |
| H466A/ <i>cmt3</i> , 2 | 58822265    | 55626051      | 94.6      | 43660615     | 74.2     | 18.3           | 99.8                 |
| H466A/ <i>cmt3</i> , 4 | 41510535    | 36800534      | 88.7      | 29581372     | 71.3     | 12.4           | 99.8                 |

\*Fold coverage was calculated by multiplying the unique reads by the read length (50bp) and dividing it by the size of the Arabidopsis genome (119Mb).

## Supplementary Table 3. List of primers used in this study

| <i>Primers for Cloning and Site Directed Mutagenesis of CMT2/CMT3 in plants</i> |            |            |                                              |
|---------------------------------------------------------------------------------|------------|------------|----------------------------------------------|
| Gene/TE                                                                         | Gene/TE ID | Name       | Primer Sequence (5'→3')                      |
| CMT3                                                                            | AT1G69770  | gCMT3-F    | TTGTTCCGCGACATTGAATTCgatggtgatacagagacactact |
| CMT3                                                                            | AT1G69770  | gCMT3-R    | CCAAGGGCGAATTGGTTCGACTGCAAGCTCGGAAGGAAGAG    |
| CMT3                                                                            | AT1G69770  | W148A-F    | CACGGCTCGGgcaTTTTATAGACCT                    |
| CMT3                                                                            | AT1G69770  | W148A-R    | AGGTCTATAAAAtgcCCGAGCCGTG                    |
| CMT3                                                                            | AT1G69770  | H466A-F    | TCAGTGGTgCcaACCGCTTC                         |
| CMT3                                                                            | AT1G69770  | H466A-R    | GAAGCGGTTGgCcaCCACTGATT                      |
| CMT3                                                                            | AT1G69770  | R573E-F    | GATCTAGTTCATgaAGGAAATATTGT                   |
| CMT3                                                                            | AT1G69770  | R573E-R    | ACAATATTTCTtcATGAAGTAGATC                    |
| CMT3                                                                            | AT1G69770  | Y717A-F    | cagGTTCCCGATgCtGCCTTAACAT                    |
| CMT3                                                                            | AT1G69770  | Y717A-R    | ATGTTAAGGCAGcATCGGGAACctg                    |
| CMT3                                                                            | AT1G69770  | R745A-F    | CTGTTGTCACAgcGGCAGAACCCC                     |
| CMT3                                                                            | AT1G69770  | R745A-R    | GGGGTTCTGCCgCtGTGACAACAG                     |
| CMT3                                                                            | AT1G69770  | Y220A-F    | CTATTTCTGCCTgCtCGATACATTTGAAG                |
| CMT3                                                                            | AT1G69770  | Y220A-R    | TTCAAATGTATCGgCtAGGCAAGAAATAG                |
| CMT3                                                                            | AT1G69770  | I584A-F    | atgcagGGAACgCtAGTAGCCTATGATG                 |
| CMT3                                                                            | AT1G69770  | I584A-R    | CATCATAGGCTACTgCtGTTTCCctgcat                |
| <i>Primers for qPCR</i>                                                         |            |            |                                              |
| Cluster4                                                                        | AT4G27930  | Cluster4-F | CGTCCTCAAAGTTCCAGA                           |
|                                                                                 |            | Cluster4-R | GGTATTCTCCATCCCAAAG                          |
| Copia11                                                                         | AT3G44215/ | Copia11-F  | TTGGAGACTAATCATACTTGGGAC                     |



|                                                                                                                          |                          |              |                                                            |
|--------------------------------------------------------------------------------------------------------------------------|--------------------------|--------------|------------------------------------------------------------|
|                                                                                                                          | AT3TE64435               | Copia11-R    | TAACCTTTGGCAACGAGACG                                       |
| AT5G26970                                                                                                                | AT5G26970                | AT5G26970-F  | TTGTCTCTATCCAAAGCCAC                                       |
|                                                                                                                          |                          | AT5G26970-R  | GTCGGGAAAACTTTGGATTC                                       |
| TM protein                                                                                                               | AT5G26270                | AT5G26270-F  | CAAAATTTCTAGTGGTGCG                                        |
|                                                                                                                          |                          | AT5G26270-R  | TTTCAAACGCCACCAAGAA                                        |
| SADHU3-2                                                                                                                 | AT3G42658/<br>AT3TE60310 | SADHU3-2-F   | TTTTCTAGGTTTCGGTTCATAC                                     |
|                                                                                                                          |                          | SADHU3-2-R   | TCCAATAGTACCAGCGATTACA                                     |
| ACT7                                                                                                                     | AT5G09810                | ACT7-F       | CCTTCCAACAGATGTGGATTTTC                                    |
|                                                                                                                          |                          | ACT7-R       | GTTCAATCCCATCTCAACTAGG                                     |
| <i>Primers for Cloning and Site Directed Mutagenesis of CMT2, CMT3, ZMET2 and histone H3 tail for protein expression</i> |                          |              |                                                            |
| CMT3                                                                                                                     | AT1G69770                | CMT3_42F     | A CAG ATT GGT GGATCC GAAGGGG AAAAGCATGT TG                 |
| CMT3                                                                                                                     | AT1G69770                | CMT3_839R    | C TTT ACC AGA CTCGAG TTATGCAAGCTCGGAAGGAA                  |
| H3                                                                                                                       |                          | H3K9C_1WF    | ACAGATTGGTGGATCCTGGGCCGTACCAAGCAGACCGCCCGTTGTCCA<br>CCGGAG |
| H3                                                                                                                       |                          | H3K9C_32R    | CTTACCAGACTCGAGTTAGGTAGCAGGAGCGGACTTC                      |
| ZMET2                                                                                                                    |                          | Y302A_F      | CTCTGTTGCAGCTTCTACATTTGCTA                                 |
| ZMET2                                                                                                                    |                          | Y302A_R      | AATGTAGAAGCTGCAACAGAGTAAGAC                                |
| ZMET2                                                                                                                    |                          | F523A_F      | TCAGTGGGGCTAATCGGTACAGAAAC                                 |
| ZMET2                                                                                                                    |                          | F523A_R      | GTACCGATTAGCCCCACTGATACCTTGCCA                             |
| ZMET2                                                                                                                    |                          | R630A_F      | GTTGTAGTAGCTGGAGGAGCCCCTAATGC                              |
| ZMET2                                                                                                                    |                          | R630A_R      | CTCCTCCAGCTACTACAACATCATAGGTG                              |
| ZMET2                                                                                                                    |                          | M641A_F      | TCGCAATGTGCTGTTGCATATGACGAGAC                              |
| ZMET2                                                                                                                    |                          | M641A_R      | ATGCAACAGCACATTGCGAAAAGGCATTAG                             |
| ZMET2                                                                                                                    |                          | D645AE646A_F | GGTTGCATATGCCGCTACACAAAAACCATCCCTG                         |
| ZMET2                                                                                                                    |                          | D645AE646A_R | GTGTAGCGGCATATGCAACCATACATTGCG                             |
| ZMET2                                                                                                                    |                          | Y776A_F      | GGTTCCTGACGCTGCAATGTCATTATCAAG                             |
| ZMET2                                                                                                                    |                          | Y776A_R      | ACATTGCAGCGTCAGGAACAGTGGTTTCCC                             |
| ZMET2                                                                                                                    |                          | R804A_F      | AGTTGTAACCGCAGCAGAGCCTCACAACCAG                            |
| ZMET2                                                                                                                    |                          | R804A_R      | GCTCTGCTGCGGTTACAACTGTAGGAAGT                              |
| ZMET2                                                                                                                    |                          | H808A_F      | AGCAGAGCCTGCCAACCAGGTTATAATTCATCCG                         |
| ZMET2                                                                                                                    |                          | H808A_R      | CCTGGTTGGCAGGCTCTGCTCTGGTTACAAC                            |
| ZMET2                                                                                                                    |                          | R630E_F      | GTTGTAGTAGAAGGAGGAGCCCCTAATGCC                             |
| ZMET2                                                                                                                    |                          | R630E_R      | CTCCTCCTTCTACTACAACATCATAGGTGGGC                           |
| ZMET2                                                                                                                    |                          | N635P_F      | AGGAGCCCCTCCTGCCTTTTCGCAATGTATGG                           |
| ZMET2                                                                                                                    |                          | N635P_R      | GAAAAGGCAGGAGGGGCTCCTCCACGTACTAC                           |
| ZMET2                                                                                                                    |                          | D645R_F      | GGTTGCATATCGCGAGACAAAAACCATCCCTG                           |
| ZMET2                                                                                                                    |                          | D645R_R      | TTGTGTCTCGGATATGCAACCATACATTGCGAA                          |
| ZMET2                                                                                                                    |                          | E646P_F      | TGCATATGACCCTACACAAAAACCATCCCTGAAG                         |
| ZMET2                                                                                                                    |                          | E646P_R      | TTTTGTGTAGGGTCATATGCAACCATACATTGC                          |

|       |           |         |                                    |
|-------|-----------|---------|------------------------------------|
| ZMET2 |           | N524A_F | AGTGGGTTTGCTCGGTACAGAAACCGTGAT     |
| ZMET2 |           | N524A_R | TCTGTACCGAGCAAACCCACTGATACCTTG     |
| ZMET2 |           | R525A_F | GGGTTTAATGCGTACAGAAACCGTGATGAG     |
| ZMET2 |           | R525A_R | GTTTCTGTACGCATTAAACCCACTGATACC     |
| ZMET2 |           | Y526A_F | TTTAATCGGGCCAGAAACCGTGATGAGCC      |
| ZMET2 |           | Y526A_R | ACGGTTTCTGGCCCGATTAAACCCACTGATAC   |
| CMT3  | AT1G69770 | Y220A_F | TTCTTGCCTGCGGATACATTTGAAGCTATACAAC |
| CMT3  | AT1G69770 | Y220A_R | AAATGTATCCGCAGGCAAGAAATAGTTCATGTC  |
| CMT3  | AT1G69770 | I584A_F | CAGGGAAACGCAGTAGCCTATGATGAAGGAC    |
| CMT3  | AT1G69770 | I584A_R | ATAGGCTACTGCGTTTCCCTGAAACTCCTTG    |
