# Supplementary material for: Mechanistic basis for maintenance of CHG DNA methylation in plants
Source: PubMed Central journal article supplement (PMC9256654; doi:10.1038/s41467-022-31627-3), 2022-07-05
Supplement: 41467_2022_31627_MOESM2_ESM.pdf [file 41467_2022_31627_MOESM2_ESM.pdf]

### **Description of Additional Supplementary Files**

File Name: Supplementary Data 1

Description: The sequences of CMT3 proteins from various plant species.
